# Supplementary material for: Evolution of Heme Peroxygenases: Ancient Roots and Later Evolved Branches
Source: MDPI journal article supplement (doi:10.3390/antiox11051011), 2022-05-20
Supplement: s1 [file s1]

|            |   | * | 20                                                                             | * | 40                                                               | *           | 60    | * | 80    |   |    |
|------------|---|---|--------------------------------------------------------------------------------|---|------------------------------------------------------------------|-------------|-------|---|-------|---|----|
| AglauHTP_A | : | M | -----                                                                          |   | GKRKSGAKQQQQQQQQRRSQWSFKR                                        | -----       |       |   | LMVGA | : | 32 |
| MuccirHTP_ | : | M | -----                                                                          |   | SKLENKTLFPKTPPKKSKSAASTIIS                                       | -----       |       |   | VILGL | : | 33 |
| RdelHTP_Rh | : | M | -----                                                                          |   | TEKVKKNQRVSIKKSRIKS                                              | -----       |       |   | LLLGL | : | 25 |
| AbHTP1_Aga | : | M | -----                                                                          |   | FILFKIFHDIAFFSWDLGL                                              | -----       |       |   |       | : | 20 |
| UmHTP3_Ust | : | M | TFPTRPSTPSYSMPATKTKVEAKGLRDESHTMHKSNSMIRLTAQLMQQNRQPQAVNIALFFIFLVDFWLTSFNVFHSA | : |                                                                  |             |       |   |       | : | 80 |
| GrosHTP2_G | : | M | -----                                                                          |   |                                                                  |             |       |   |       | : | 1  |
| PoxaHTP1_P | : | M | -----                                                                          |   |                                                                  |             |       |   |       | : | 1  |
| GzHTP3_Gib | : | M | -----                                                                          |   |                                                                  |             |       |   |       | : | 1  |
| PcarHTP4_P | : | M | -----                                                                          |   |                                                                  |             |       |   |       | : | 1  |
| SlutHTP4_S | : | M | -----                                                                          |   |                                                                  |             |       |   |       | : | 1  |
| SdicHTP1_S | : | M | -----                                                                          |   |                                                                  | RPTSLQM     | ----- |   |       | : | 8  |
| SpispHTP_S | : | M | -----                                                                          |   |                                                                  |             |       |   |       | : | 1  |
| PparHTP1_P | : | M | -----                                                                          |   | VSLGTSLVAAAVAVASFAPSSS                                           | -----       |       |   |       | : | 24 |
| PsojHTP2_P | : | M | -----                                                                          |   | VSFTRSIAVAAIATISSAWALQE                                          | -----       |       |   |       | : | 24 |
| PfungHTP1_ | : | M | -----                                                                          |   | SSWKASIPYRPAHLLIEEDFGYSYVCISDFQGKRSWSVSPRTRESFFVWPPFTGQKPQMKTAFI |             |       |   |       | : | 65 |
| AaeAPO_Agr | : | M | -----                                                                          |   | KYFPLFPTLVFAARVAF                                                | -----       |       |   | PAYAS | : | 24 |
| CfumagHTP_ | : | E | -----                                                                          |   |                                                                  |             |       |   |       | : | 1  |
| MrotHTP1_M | : | S | -----                                                                          |   |                                                                  |             |       |   |       | : | 1  |
| HspHTP1_Hy | : | M | -----                                                                          |   |                                                                  | KSLSFSLALGF | ----- |   |       | : | 12 |
| MtherHTP_M | : | M | -----                                                                          |   |                                                                  |             |       |   |       | : | 1  |

m

|            |   | *                                                                                | 100   | *              | 120   | *  | 140 | * | 160 |  |
|------------|---|----------------------------------------------------------------------------------|-------|----------------|-------|----|-----|---|-----|--|
| AglauHTP_A | : | ILGFLVIQVIRIELQAA-GSTKTPD                                                        | ----- | EWRALVK        | ----- | :  | 63  |   |     |  |
| MuccirHTP_ | : | IAAYLVSAIINIEVTGR-RGLKSTA                                                        | ----- | EWKELIK        | ----- | :  | 64  |   |     |  |
| RdelHTP_Rh | : | FTTFTVLGAILLEADSRSGIKSPE                                                         | ----- | QWYEIMK        | ----- | :  | 57  |   |     |  |
| AbHTP1_Aga | : | ---TFVNLVLPNRPVGKVTPEGHPG                                                        | ----- | Y              | ----- | :  | 43  |   |     |  |
| UmHTP3_Ust | : | LIKLGVINPLPENCVPPAFSPTSPPSFAQWPLTHIYCRLIHIYNFVTSYSEDERLHHDLYCRKPKNDWIRDWAYWDGIGH | :     | 160            |       |    |     |   |     |  |
| GrosHTP2_G | : | -----NSFRLLHSIKRYSMS                                                             | ----- | :              | 16    |    |     |   |     |  |
| PoxaHTP1_P | : | -----PSQLQALE                                                                    | ----- | :              | 9     |    |     |   |     |  |
| GzHTP3_Gib | : | -----ASSIQPLT                                                                    | ----- | :              | 9     |    |     |   |     |  |
| PcarHTP4_P | : | -----SSSG                                                                        | ----- | :              | 5     |    |     |   |     |  |
| SlutHTP4_S | : | -----STPNWTCPP                                                                   | ----- | :              | 10    |    |     |   |     |  |
| SdicHTP1_S | : | ---AAALAVLATSARRFASYASNPP                                                        | ----- | P              | ----- | :  | 31  |   |     |  |
| SpispHTP_S | : | -----TSTT                                                                        | ----- | A              | ----- | :  | 6   |   |     |  |
| PparHTP1_P | : | ----RVLDPNKLVVGEFFKPSGHI                                                         | ----- | V              | ----- | :  | 45  |   |     |  |
| PsojHTP2_P | : | -----GEYYRPTTSE                                                                  | ----- | A              | ----- | :  | 35  |   |     |  |
| PfungHTP1_ | : | FALLFLAAAYPRKNGKIVFPAYDD                                                         | ----- | D              | ----- | :  | 91  |   |     |  |
| AaeAPO_Agr | : | LAGLSQQELDAIIPtleAREPGLPP                                                        | ----- | GPLENSSAKLVNDE | :     | 63 |     |   |     |  |
| CfumagHTP_ | : | -----PGSGIGYPYDN                                                                 | ----- | N              | ----- | :  | 13  |   |     |  |
| MrotHTP1_M | : | -----                                                                            | ----- | :              | -     |    |     |   |     |  |
| HspHTP1_Hy | : | -----GSTLVYSAPS                                                                  | ----- | P              | ----- | :  | 23  |   |     |  |
| MtherHTP_M | : | -----RASVLPVLIAISPALAG                                                           | ----- | :              | 18    |    |     |   |     |  |

|            | * | 180        | *          | 200                                                      | *                      | 220                                      | *                                  | 240             |     |     |
|------------|---|------------|------------|----------------------------------------------------------|------------------------|------------------------------------------|------------------------------------|-----------------|-----|-----|
| AglauHTP_A | : | QRPYA----  | RLPTDARS   | PCPMLNLLANHGFLPRDGRHISKAQLYDALVLVGAPPTITYGFLTTVVYR-----  | :                      | 126                                      |                                    |                 |     |     |
| MuccirHTP_ | : | EHYPYQ---- | RKDTDLRS   | PCPMLNNTLANHGFIARDGRNIKSEELFDALMLMGAPPTVTVVILNYVFSQ----- | :                      | 127                                      |                                    |                 |     |     |
| RdelHTP_Rh | : | SHPYE----  | RKLSDLRS   | PCPMVNTLANHGFLPRDGRDVKPTDIYNVLSLLRIPPVFSVGIIAFAYSQ-----  | :                      | 120                                      |                                    |                 |     |     |
| AbHTP1_Aga | : | GGKWPEYI   | PPKEGDSRCS | CPALNAMANHGILPRDGKNIQFKEMGRLI                            | RTTYNFSSSF             | FCYFVPHYAAE-----                         | :                                  | 110             |     |     |
| UmHTP3_Ust | : | KGEGAPYP   | PARDNSRCP  | CPGLNVLA                                                 | THGLIHQSGRKVAASKMVVALS | RAFNIAPTMALQLYSPLFP-----                 | :                                  | 227             |     |     |
| GrosHTP2_G | : | AHVWQ---   | GPGTHDKRS  | PCPALNALANHG                                             | YLPHSGENITKSQ          | LARGLEGLNASSLLANFLAYGGFN-----            | :                                  | 80              |     |     |
| PoxaHTP1_P | : | KGEFR---   | PADSGDLRS  | PCPVLNSLANHG                                             | FIPRDGRNITANQ          | LKDALQRIGTGVDIRHTLVNRAFTV-----           | :                                  | 73              |     |     |
| GzHTP3_Gib | : | KGVYA---   | PSGPNDIRG  | PCPLINSLANHG                                             | YLPRDGRNV              | RVEEVLAMNAVGLSKPLGA                      | AFANPIFQERAPSKFHDDQVTQ             | :               | 86  |     |
| PcarHTP4_P | : | SHAFC---   | PPMEGDSRSP | CPAVNTLANHG                                              | YLP                    | RDGKSITPALLIDALTQCYRLSKPLAWILAYGGLL----- | :                                  | 69              |     |     |
| SlutHTP4_S | : | AHPFI---   | PATQGD     | RRSPCPALNALANHG                                          | YLP                    | RNGQNI                                   | GLWHLISAVQEVYNLSFILA               | AVLALAGVL-----  | :   | 74  |
| SdicHTP1_S | : | FQPWS---   | PTDPTNM-AP | CPMLNALSNHG                                              | VLP                    | RS--NISASDLRSALGALQCDSLIQRILSRDSVMA----- | :                                  | 92              |     |     |
| SpispHTP_S | : | HPQWK---   | PAGKT      | DARSPCP                                                  | LLNALANHDILPHSGR       | IDPTTLTSSLRKAGIDPGISDRLVSITMGM-----      | :                                  | 70              |     |     |
| PparHTP1_P | : | SGFFN---   | TTA-PFRR   | SPCPALNALANHG                                            | HL                     | SRDGGGITKDQIGSALKSVLNQ                   | GDDAVVALLASLPE-----                | :               | 108 |     |
| PsojHTP2_P | : | SGVYG---   | TTA-PYRR   | APCPALNTLANHG                                            | YLP                    | RNGQNI                                   | THDMLSSALQKVYNIGPGVAALLVAALPD----- | :               | 98  |     |
| PfungHTP1_ | : | EHVWS---   | AAGAGD     | VRSPCPALNTLANH                                           | NWLP                   | HDGKNI                                   | SKAALMSALTDGLNVGYDVALLLATGAFS----- | :               | 155 |     |
| AaeAPO_Agr | : | AHPWK---   | PLRPGD     | IRGCPGLNTLA                                              | SHGYLP                 | RNGVA-TPVQIINAVQEG                       | LNFDNQA                            | AVFATYAAHL----- | :   | 126 |
| CfumagHTP_ | : | TLPYV---   | APGPTDS    | RAPCPALNALANHG                                           | YIP                    | HDGRAISRETLQNAFLNHMG                     | IANSVIELALTNAFV-----               | :               | 77  |     |
| MrothTP1_M | : | AHPWK---   | APGP       | NSRGPCPGLNTLANHG                                         | FL                     | PRNGRNI                                  | SVPMIVKAGFEGYNVQSDILILAGKIGML----- | :               | 65  |     |
| HspHTP1_Hy | : | SSGWQ---   | APGP       | NDVRAPCPMLNTLANHG                                        | FL                     | PHDGKGI                                  | TVNKTIDALGSALNIDANLSTLLFGFAAT----- | :               | 87  |     |
| MtherHTP_M | : | FDTWS---   | PPGPYD     | VRAPCPMLNTLANHG                                          | FL                     | PHDGKDI                                  | TREQTENALFEALHINKTLASFLFDFALT----- | :               | 82  |     |

5 r pCP 6N 6anHg 6p g

|              | *     | 260                  | *     | 280                | *              | 300    | *            | 320   |      |       |                   |
|--------------|-------|----------------------|-------|--------------------|----------------|--------|--------------|-------|------|-------|-------------------|
| AglauHTP_A : | ----- | MYHRVAPDAPFWTNFVAAPT | ----- | IDLDMLAIHNL        | IEHDVSLTR      | LD     | SAL          | ----- | D    | ----- | DTA : 175         |
| MuccirHTP_ : | ----- | LQEANPHDSLFAQFKSLKTL | ----- | LDLRLTVFGV         | LEHDVSLTR      | QD     | FAL          | ----- | GHQ  | ----- | DTS : 177         |
| RdelHTP_Rh : | ----- | YNEAVPDKHSLSQLGFTDK  | ----- | INLNQLSVYDV        | LEHDVSLTR      | HD     | TAL          | ----- | LPH  | ----- | NTT : 170         |
| AbHTP1_Aga : | ----- | KVVKKDY              | ----- | NKDTFNLDEL         | DHNGIEHDAS     | LC     | REDSAL       | ----- | CP   | ----- | DQS : 151         |
| UmHTP3_Ust : | ----- | VFSERAH              | ----- | IFDLESIGIANI       | IEHDASLL       | RP     | DYHLADWHKDPK | ----- |      | ----- | AMS : 271         |
| GrosHTP2_G : | ----- | LLGKLDDK             | ----- | TINLDDL            | NQHNKCEHDAS    | LR     | KDFYF        | ----- | G    | ----- | DNH : 118         |
| PoxaHTP1_P : | ----- | HDETS                | ----- | HIGLRNPGQVNESGMPVL | NLDQTGRPHAI    | EH     | DVSLSREDRAL  | ----- | G    | ----- | DCI : 124         |
| GzHTP3_Gib : | ----- | RSLLQKLWQTVTDPWSVL   | ----- | GKFGMRKPGQVDSEGH   | RVNL           | DQ     | GLPNTVEHDISL | ----- | G    | ----- | DNI : 151         |
| PcarHTP4_P : | ----- | LLGQGLG              | ----- | PFELHDL            | ARHNKIEHDAS    | LF     | HPNIGP       | ----- | REEY | ----- | API : 109         |
| SlutHTP4_S : | ----- | FCGRAF               | ----- | RLDL               | DALALHNKIEHDAS | LV     | HADALG       | ----- | QQR  | ----- | API : 112         |
| SdicHTP1_S : | ----- | LGHGG                | ----- | LLTLADLDVHGA       | IEHDASLR       | QD     | AAL          | ----- | G    | ----- | DNT : 127         |
| SpispHTP_S : | ----- | TGRETPS              | ----- | GK-VLDL            | DMLNEHNL       | IEHDAS | LRSDSGV      | ----- | G    | ----- | DNS : 109         |
| PparHTP1_P : | ----- |                      | ----- | TIALSDLSQHN        | VWDHDAS        | LV     | HTDAHF       | ----- | GH   | ----- | DPA : 139         |
| PsojHTP2_P : | ----- |                      | ----- | PINLDYLG           | IHNKIEHDAS     | LA     | HTDAYY       | ----- | VH   | ----- | DPM : 129         |
| PfungHTP1_ : | ----- | DLGTPE               | ----- | TITLEELQKHNM       | IEHDASLR       | LD     | NYL          | ----- | G    | ----- | DST : 191         |
| AaeAPO_Agr : | ----- | VDGNLITDLLSIGRK      | ----- | TRLTGPD            | PPPPASVGG      | LN     | EHGTFEGDAS   | ----- | G    | ----- | NNH : 181         |
| CfumagHTP :  | ----- | VCEYVTGSDC           | ----- | GD                 | SLVNLTL        | LAEP   | FAFEHDH      | ----- | G    | ----- | VANSNDFIDNR : 128 |
| MrothTP1_M : | ----- | TSREAD               | ----- | TISLED             | KLHGTIEHDAS    | LS     | REDVAI       | ----- | G    | ----- | DNL : 101         |
| HspHTP1_Hy : | ----- | TNPQPNAT             | ----- | FFDL               | DHL            | SRHNI  | LEHDAS       | ----- | G    | ----- | PAD : 125         |
| MtherHTP_M : | ----- | TNPKNTS              | ----- | TFSL               | NDLGNHNI       | LEHDAS | LSRADAYF     | ----- | G    | ----- | NVL : 119         |

6 ehD S r 1

```

      *           340           *           360           *           380           *           400
AglauHTP_A : IPQANLVRRMHQWTL-----QHDGQLDMQAEHDLRKIRWYESTLSNPKSHLGLLYQFSSSTECALLLDILGRD----- : 243
MuccirHTP_ : HVVPEYVDRMIKLAETKNQG-ELKGIFTRENENDARKLRWMESIRDNRHMHNLNFFSQFASSTECSLLLDILGRD----- : 250
RdelHTP_Rh : YPAPELIERMIRLVELNNTSTENKEYFTFENEHDARKLRWLESTKHNPFLFHYPLFLQIASSFECNLLLNTIGRH----- : 244
AbHTP1_Aga : KPHVEYITQLLAHATGKDK--DGNPLLTMKDLAKYSSKRRADARSYNKKFTLGFIIHRMFGSSSNSSTMLTIFGG----- : 222
UmHTP3_Ust : RPHQDMIDRWFPAPTKHG---KVKADLTDRDFAEAVCIIRSESRKHNRQYSSNVVQSLIGSGSCCLMLNVFGGKVLDLRE : 348
GrosHTP2_G : TVNPELVDDLKQ-----NIDRKIKEEPLSKLHWIRLNNKEVNPULLYKFKQKFLSAGESSLLLNFIGAN----- : 184
PoxaHTP1_P : KADPDLVDKLIQYP-----GNKDSFTISDLGRFRKRHRHTEQMARNSDLKFDSSKHKKACGEAALFQSIFGKG----- : 191
GzHTP3_Gib : TLQKDLVEDLLASS-----KDGKVITVDDLVEFRKKRIARQKEDNPGVQYGAFENDLACAEIALILNVIGTG----- : 218
PcarHTP4_P : HGEAQLLRAFLAMS-----ADGRVITPEDLARIRVQREAET-----PLDPLHAEIARGEMAIVFNMFNNDPPTLHE : 175
SlutHTP4_S : EVDPKLLKSFLSHA-----DPQRGMSLYDLAQVRISR--EAQLARP---LDLVHSQIGAAEAALCWLLKQD----- : 174
SdicHTP1_S : KLDPTLLAAFQAIS-----SDGKYITKAELAAYRLARAADSKARNPAFRFGAREQVVAYAEAAVLFVAFED----- : 193
SpispHTP_S : AVNKTLLVEQLLAFS-----KDGKTIDYDDMAKLRRLRYRQSQATNKNLIYGAWQYLLASGEAVLLIETFGGK----- : 176
PparHTP1_P : EVNITLANDLLNRG-----KASNKLGVNEVGNAAYKDRRQAGKPYEPKYSLSDAQKTQSYSGAGLLLVFGAK----- : 206
PsojHTP2_P : TANVTLAEEFFSRA-----GSDGLLTNSIVAKTRKDRGNTCNAQNPECSYGVQAQSLAFLEASVLLMALGSG----- : 196
PfungHTP1_ : KLDQTLFERLLNAS-----SDGITISIPDFVKYRREERQEESEKTNPNSEVFGKKQLIAAAGEVVLVSTIFGSY----- : 258
AaeAPO_Agr : DFNETLFEQLVDYSNR-----FGGGKYNLTVAGELRFKRIQDSIATNPNFSFVDFRFFFTAYGETTFPANLFVDG----- : 250
CfumagHTP_ : NFDAETFQTSLDVV-----AGKTHFDYADMNEIRLQRESLSNELDFPGWFTE-SKPIQNVESGFIFALVSDF----- : 194
MrothTP1_M : HFNEAIFTTLANSN-----PGADVYNISSAAQVQHDRLADSLARNPNVTNTDLTATIRSSESAFFLTVMSAG----- : 168
HspHTP1_Hy : VFNEAVFNQTKSF-----WTGDIIDVQMAANARIVRLLTNLNPEYSLSDLGSAFSIGESAAYIGILGDK----- : 191
MtherHTP_M : QFNQTVFDETKTY-----WEGDTIDLRMAAKARLGRIKTSQATNPITYSMSELGDAFTYGEAAYVVVLGDK----- : 185

```

R

|              |                                                  | *     | 420                      | *     | 440              | *                          | 460   | *         | 480       |                              |
|--------------|--------------------------------------------------|-------|--------------------------|-------|------------------|----------------------------|-------|-----------|-----------|------------------------------|
| AglauHTP_A : | -----                                            | GT    | MRADHIEALLLDERFP         | ----- | DD               | WYPREKA                    | ----- |           |           | : 270                        |
| MuccirHTP_ : | -----                                            | GT    | ITLPHLKSFLLNESFP         | ----- | ED               | WHPRETT                    | ----- |           |           | : 277                        |
| RdelHTP_Rh : | -----                                            | GRL   | RVDHLESILLHERFP          | ----- | ND               | WYPPTPEP                   | ----- |           |           | : 271                        |
| AbHTP1_Aga : | -----                                            |       |                          | ----- | RV               | KDLETVLLERLP               | ----- | EN        | WESRVGKMG | : 249                        |
| UmHTP3_Ust : | MA-----                                          | GS    | VEHDL-PGVRTTRAGLEYGYERIP | ----- | PART             | INAKKGSE                   | ----- |           |           | : 386                        |
| GrosHTP2_G : | -----                                            | TD    | -----                    | LE    | IEIEKLEVFLKHERFP | -----                      | EG    | WRKPNKV   | -----     | : 213                        |
| PoxaHTP1_P : | -----                                            | VF    | -----                    | YN    | LPTKYVKSMFQEERLP | -----                      | YE    | ED        | -----     | : 215                        |
| GzHTP3_Gib : | -----                                            |       |                          | ----- | DR               | VECSYARAFLLQERLP           | ----- | PI        | DEGWKKRS  | : 245                        |
| PcarHTP4_P : | AGVPLQPRRSIFRLVHTLLHRPDTGASRPLDGVPIDRLRYWFEHERIP | ----- | PG                       | WE    | PEPYHE           | -----                      |       |           |           | : 231                        |
| SlutHTP4_S : | -----                                            | SG    | -----                    | RI    | PSSTLLQWYGEERLP  | -----                      | DN    | WARPRRV   | -----     | : 202                        |
| SdicHTP1_S : | -----                                            | DS    | -----                    | GAM   | RLDWLEMFFAQEKLP  | -----                      | FE    | LGWTLRH   | -----     | : 222                        |
| SpispHTP_S : | -----                                            | EQ    | -----                    | KI    | PIETARELLHERFP   | -----                      | EN    | WTPKETP   | -----     | : 204                        |
| PparHTP1_P : | -----                                            | NG    | -----                    | ES    | VSLDVARSLVEERIP  | -----                      | DG    | WKPAATP   | -----     | : 235                        |
| PsojHTP2_P : | -----                                            |       |                          | ----- | DS               | ISVDHARSFIVDEKIP           | ----- | AD        | YKAPKSS   | : 223                        |
| PfungHTP1_ : | -----                                            | FS    | -----                    | GL    | PVEAARTFFGSEERFP | -----                      | DG    | WTKPAFP   | -----     | : 286                        |
| AaeAPO_Agr : | -----                                            | RR    | DD                       | ----- | GQ               | LDMDAARSFFQFSRMP           | ----- | DD        | FFRAPS    | PRSGTGVEVVIQAHPMQPGRNV : 302 |
| CfumagHTP_ : | -----                                            | NLP   | DNDENPLVRIDWWKYWFTNESFP  | ----- | PY               | HLGWHPSPAREIEFVTSAS        | ----- |           |           | : 241                        |
| MrothTP1_M : | -----                                            | DPL   | R                        | ----- | GE               | APKKFVNFFREERMPIKEGWKRSTTP | ----- |           |           | : 201                        |
| HspHTP1_Hy : | -----                                            | KS    | -----                    | AT    | VPKSWVEYLFENERLP | -----                      | YE    | LGFKRPNDP | -----     | : 222                        |
| MtherHTP_M : | -----                                            | ES    | -----                    | RT    | VKRSWVEWFFEHEQLP | -----                      | QH    | LGWKRPAAS | -----     | : 216                        |

e P

|              | *      | 500                         | *                                                      | 520                | * | 540 | * | 560 |       |
|--------------|--------|-----------------------------|--------------------------------------------------------|--------------------|---|-----|---|-----|-------|
| AglauHTP_A : | -----  | YPAL--                      | QALVRPLKCWYGIRKSAATLES                                 | LQALSNDTQQILV----- |   |     |   |     | : 309 |
| MuccirHTP_ : | -----  | FTLK--                      | ELATKPLICWHGLRNSQVSLDLINELA-----                       |                    |   |     |   |     | : 308 |
| RdelHTP_Rh : | -----  | TSLS--                      | EILIDPLNCWKGLRSNVFSF-----                              |                    |   |     |   |     | : 295 |
| AbHTP1_Aga : | -----  | LTFAAFNL                    | TVTPVELMISEKKYLKEKAAKEANKDD-----                       |                    |   |     |   |     | : 284 |
| UmHTP3_Ust : | -----  | CCPI--                      | VSTTQKQRWQPATAKWYFGMTIFYALWTTFKIEMRARA-----            |                    |   |     |   |     | : 428 |
| GrosHTP2_G : | -----  | VGIW--                      | PIISSLFSFLKRYDQLEKEQKK-----                            |                    |   |     |   |     | : 239 |
| PoxaHTP1_P : | -----  |                             | SDIALCFANLI-----                                       |                    |   |     |   |     | : 226 |
| GzHTP3_Gib : | -----  | FGIV--                      | SLITERDKVKKKLGMDFKS-----                               |                    |   |     |   |     | : 268 |
| PcarHTP4_P : | -----  | TTLL--                      | DTVATSMRIRRAMKITREVASERRGRSH-----                      |                    |   |     |   |     | : 263 |
| SlutHTP4_S : | -----  | IGLL--                      | DARSKAAEVTNIMSSLKKSTCRTPSSSNFDVSVLGLRTILTCDS--         |                    |   |     |   |     | : 251 |
| SdicHTP1_S : | -----  |                             | ISLSRVLLVAGELRSSAFGAEVLAMIA-----                       |                    |   |     |   |     | : 249 |
| SpispHTP_S : | -----  | TGRL--                      | GLFANVAKLRFKMLTAPSHELEKQALRDEL-----                    |                    |   |     |   |     | : 238 |
| PparHTP1_P : | -----  | ITVA--                      | DSRATSAKLREVAEAV-----                                  |                    |   |     |   |     | : 255 |
| PsojHTP2_P : | -----  | VGVA--                      | AVTARAALLKAQSLTWAM-----                                |                    |   |     |   |     | : 245 |
| PfungHTP1_ : | -----  | VFAA--                      | ELIPQITRVAWQCS-----                                    |                    |   |     |   |     | : 304 |
| AaeAPO_Agr : | GKINSY | TVDPTSSDFSTPCLMYEKFVNITVK-- | SLYPNPTVQLRKALNTNLDFFFQGVAAAGCTQVFPYGRD-----           |                    |   |     |   |     | : 371 |
| CfumagHTP_ : | -----  |                             | SAVLAASVTSTPSSLPSGAIGPGAEEAVPLSFASMTTPFLLATNAPYYAQDPTL |                    |   |     |   |     | : 294 |
| MrotHTP1_M : | -----  | ITI--                       | PLLGPIIERITELSDWKPTGDNCGAIVLSPEL-----                  |                    |   |     |   |     | : 236 |
| HspHTP1_Hy : | -----  | FTTDDL                      | GDLSTQIINAQHFPQSPGKVEKRGDTRCPYGYH-----                 |                    |   |     |   |     | : 261 |
| MtherHTP_M : | -----  | FEEE--                      | DLNSSMEEIEKYTKELEGSNSTSGSQKHRRRLPRRRRAHFGF-----        |                    |   |     |   |     | : 261 |

|            |   |      |   |     |
|------------|---|------|---|-----|
| AglauHTP_A | : | ---- | : | -   |
| MuccirHTP_ | : | ---- | : | -   |
| RdelHTP_Rh | : | ---- | : | -   |
| AbHTP1_Aga | : | ---- | : | -   |
| UmHTP3_Ust | : | ---- | : | -   |
| GrosHTP2_G | : | ---- | : | -   |
| PoxaHTP1_P | : | ---- | : | -   |
| GzHTP3_Gib | : | ---- | : | -   |
| PcarHTP4_P | : | ---- | : | -   |
| SlutHTP4_S | : | ---- | : | -   |
| SdicHTP1_S | : | ---- | : | -   |
| SpispHTP_S | : | ---- | : | -   |
| PparHTP1_P | : | ---- | : | -   |
| PsojHTP2_P | : | ---- | : | -   |
| PfungHTP1_ | : | ---- | : | -   |
| AaeAPO_Agr | : | ---- | : | -   |
| CfumagHTP_ | : | GPND | : | 298 |
| MrotHTP1_M | : | ---- | : | -   |
| HspHTP1_Hy | : | ---- | : | -   |
| MtherHTP_M | : | ---- | : | -   |
